# Supplementary material for: De Novo Genome Assembly at Chromosome-Scale of Hermetia illucens (Diptera Stratiomyidae) via PacBio and Omni-C Proximity Ligation Technology
Source: MDPI journal article supplement (doi:10.3390/insects15020133), 2024-02-17
Supplement: s1 [file s1]

### BUSCO statistics of blobtools filtered assembly

- Complete (C) and single copy (S)
- Complete (C) and duplicated (D)
- Fragmented (F)
- Missing (M)

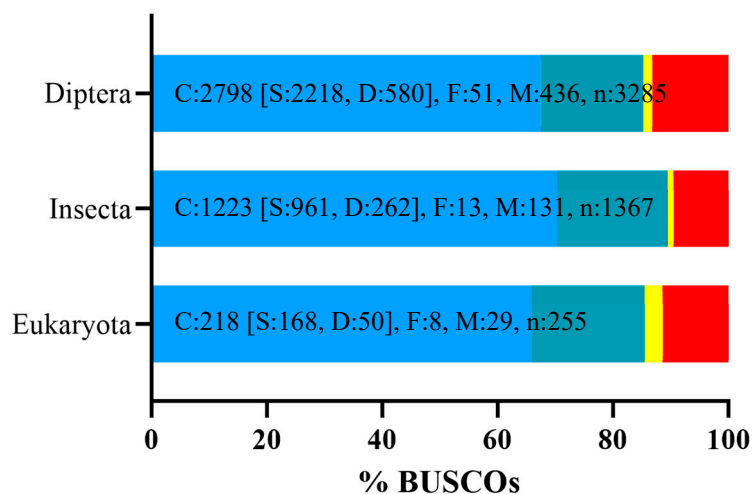

Figure S1. BUSCO scores of the blobtools filtered assembly against Diptera, Insecta and Eukaryota databases. Used databases to assess completeness against dipterans, insects and eukaryotes: “diptera\_odb10”, “insecta\_odb10” and “eukaryota\_odb10” databases, respectively. BUSCO= Benchmarking Universal Single-Copy Orthologs.
